# Supplementary material for: Associations between glucocorticoid use and major adverse cardiovascular events in patients with prostate cancer receiving antiandrogen: a retrospective cohort study
Source: Springer Nature journal article supplement (doi:10.1038/s41391-024-00889-x), 2024-09-10

## **SUPPLEMENTARY MATERIAL**

**Supplementary Table 1.** Characteristics of included patients.

|                                                                                               | Enzalutamide      | Abiraterone + 5mg total daily<br>prednisolone/prednisone | Abiraterone + 10mg total daily<br>prednisolone/prednisone |
|-----------------------------------------------------------------------------------------------|-------------------|----------------------------------------------------------|-----------------------------------------------------------|
| Sample size                                                                                   | 392               | 92                                                       | 449                                                       |
| Age, years [IQR]                                                                              | 72 [66-78]        | 73 [65-78]                                               | 69 [64-76]                                                |
| Type of ADT, N (%)                                                                            |                   |                                                          |                                                           |
| Pharmacological only                                                                          | 235 (60.0)        | 78 (84.8)                                                | 256 (57.0)                                                |
| Surgical only                                                                                 | 87 (22.2)         | 7 (7.6)                                                  | 105 (23.4)                                                |
| Both pharmacological and surgical                                                             | 70 (17.9)         | 7 (7.6)                                                  | 88 (19.6)                                                 |
| Hypertension, N (%)                                                                           | 150 (38.3)        | 20 (21.7)                                                | 132 (29.4)                                                |
| Ischaemic heart disease, N (%)                                                                | 32 (8.2)          | 2 (2.2)                                                  | 34 (7.6)                                                  |
| Chronic kidney disease, N (%)                                                                 | 8 (2.0)           | 0 (0)                                                    | 10 (2.2)                                                  |
| Diabetes mellitus, N (%)                                                                      | 95 (24.2)         | 13 (14.1)                                                | 51 (11.4)                                                 |
| Dyslipidaemia, N (%)                                                                          | 92 (23.5)         | 9 (9.8)                                                  | 56 (12.5)                                                 |
| Other malignancies, N (%)                                                                     | 20 (5.1)          | 6 (6.5)                                                  | 24 (5.4)                                                  |
| Ever received radical prostatectomy, N (%)                                                    | 99 (25.3)         | 22 (23.9)                                                | 97 (21.6)                                                 |
| Ever received radiotherapy, N (%)                                                             | 67 (17.1)         | 15 (16.3)                                                | 111 (24.7)                                                |
| Ever received chemotherapy, N (%)                                                             | 168 (42.9)        | 28 (30.4)                                                | 237 (52.8)                                                |
| Anticoagulant use, N (%)                                                                      | 154 (39.3)        | 32 (34.8)                                                | 181 (40.3)                                                |
| Prostate-specific antigen, ng/mL [IQR]                                                        | 59.4 [14.7-228.5] | 34.4 [8.9-217.5]                                         | 107.2 [27.9-339.0]                                        |
| ADT duration prior to the start of follow-up,<br>months [IQR]                                 | 29.2 [17.0-52.7]  | 7.0 [1.4-24.2]                                           | 30.4 [16.3-52.2]                                          |
| Cumulative prednisolone-equivalent glucocorticoid<br>dose at the start of follow-up, mg [IQR] | 0 [0-36.6]        | 6.1 [6.1-12.2]                                           | 36.6 [6.1-91.5]                                           |

ADT, androgen deprivation therapy. IQR, interquartile range.

**Supplementary Table 2.** Results of the sensitivity analysis where only patients who received enzalutamide were compared against patients who received abiraterone with 10mg total daily dose of prednisolone.

|                                                                                                                                                | MACE (aHR)                             | MACE <sub>alternative</sub> (aSHR)     |
|------------------------------------------------------------------------------------------------------------------------------------------------|----------------------------------------|----------------------------------------|
| Primary analysis                                                                                                                               | 0.60 [0.51-0.70], p<0.001              | 0.60 [0.47-0.77], p<0.001              |
| Secondary analysis (with adjustment for cumulative glucocorticoid dose at the start of follow-up instead of prior systemic glucocorticoid use) | 0.69 [0.58-0.81], p<0.001 <sup>1</sup> | 0.68 [0.53-0.86], p=0.002 <sup>2</sup> |

aHR, adjusted hazard ratio. SHR, adjusted subhazard ratio. MACE, major adverse cardiovascular events. MACE<sub>alternative</sub>, alternatively defined major adverse cardiovascular events.

<sup>1</sup> aHR for log-transformed cumulative glucocorticoid dose at the start of follow-up: 1.10 [1.04-1.16], p=0.001

<sup>2</sup> aSHR for log-transformed cumulative glucocorticoid dose at the start of follow-up: 1.06 [1.03-1.10], p<0.001

**Supplementary Figure 1.** Patient flow diagram. HF, heart failure. MI, myocardial infarction. PSA, prostate-specific antigen.

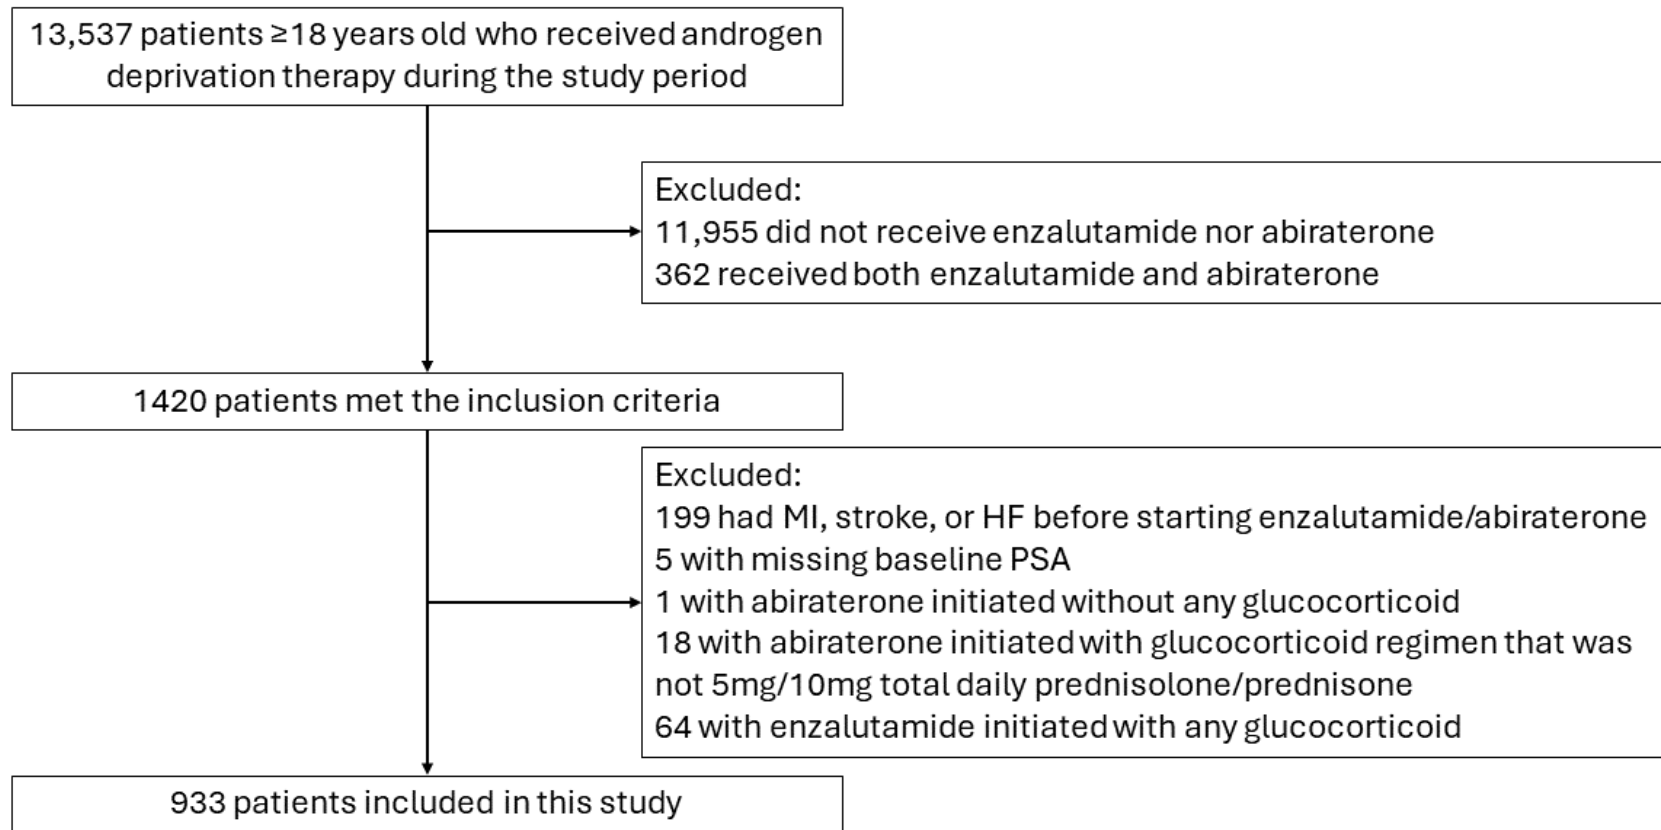

Supplement: MOESM1 [file 41391_2024_889_MOESM1_ESM.pdf]
